# Supplementary material for: Association of Serum Vitamin B12 and Circulating Methylmalonic Acid Levels with All-Cause and Cardiovascular Disease Mortality among Individuals with Chronic Kidney Disease
Source: MDPI journal article supplement (doi:10.3390/nu15132980), 2023-06-30
Supplement: s1 [file s1]

Supplementary Materials

**Table S1.** Baseline characteristics of study participants for CKD among U.S. adults by baseline serum vitamin B12 levels.

| Characteristic                           | Participants, No. (%)                        |                            |                             |                             |                                | P value <sup>a</sup> |
|------------------------------------------|----------------------------------------------|----------------------------|-----------------------------|-----------------------------|--------------------------------|----------------------|
|                                          | Serum vitamin B <sub>12</sub> levels, pmol/L |                            |                             |                             |                                |                      |
|                                          | Total                                        | Quartile 1<br>( $<284.1$ ) | Quartile 2<br>(284.1-397.1) | Quartile 3<br>(397.2-534.5) | Quartile 4<br>( $\geq 534.6$ ) |                      |
| Participants, No.                        | 2589 (100.0)                                 | 593 (22.9)                 | 677 (26.2)                  | 636 (24.6)                  | 683 (26.4)                     | -                    |
| Age, years, mean (SE)                    | 59.04 (0.6)                                  | 57.69 (1.3)                | 57.87 (0.8)                 | 58.57 (1.1)                 | 62.02 (0.8)                    | 0.016                |
| Sex, n (%)                               |                                              |                            |                             |                             |                                |                      |
| Male                                     | 1324 (46.8)                                  | 326 (49.4)                 | 377 (50.8)                  | 313 (43.9)                  | 308 (43.0)                     | 0.034                |
| Female                                   | 1265 (53.2)                                  | 267 (50.6)                 | 300 (49.2)                  | 323 (56.1)                  | 375 (57.1)                     |                      |
| Race, n (%)                              |                                              |                            |                             |                             |                                | 0.033                |
| Hispanic                                 | 580 (12.6)                                   | 117 (11.1)                 | 158 (14.4)                  | 151 (12.9)                  | 154 (11.9)                     |                      |
| Non-Hispanic white                       | 1302 (69.7)                                  | 333 (75.5)                 | 342 (68.8)                  | 318 (69.6)                  | 309 (65.2)                     |                      |
| Non-Hispanic black                       | 543 (11.5)                                   | 107 (8.7)                  | 139 (12.0)                  | 128 (11.3)                  | 169 (14.2)                     |                      |
| Others                                   | 164 (6.1)                                    | 36 (4.8)                   | 38 (4.9)                    | 39 (6.2)                    | 51 (8.7)                       |                      |
| Education, n (%)                         |                                              |                            |                             |                             |                                | 0.108                |
| Less than high school                    | 911 (25.2)                                   | 195 (21.5)                 | 252 (29.7)                  | 226 (23.1)                  | 238 (26.2)                     |                      |
| High school                              | 594 (24.2)                                   | 134 (23.7)                 | 154 (22.5)                  | 152 (26.0)                  | 154 (24.6)                     |                      |
| College or higher                        | 1084 (50.7)                                  | 264 (54.8)                 | 271 (47.8)                  | 258 (50.9)                  | 291 (49.2)                     |                      |
| Marital status, n (%)                    |                                              |                            |                             |                             |                                | 0.275                |
| Married                                  | 1337 (53.9)                                  | 282 (49.5)                 | 351 (53.9)                  | 345 (55.9)                  | 359 (56.2)                     |                      |
| Separated                                | 980 (34.4)                                   | 238 (35.7)                 | 255 (34.6)                  | 219 (31.9)                  | 268 (34.8)                     |                      |
| Never married                            | 272 (11.9)                                   | 73 (14.8)                  | 71 (11.5)                   | 72 (12.1)                   | 56 (9.1)                       |                      |
| PIR, n (%)                               |                                              |                            |                             |                             |                                | 0.534                |
| ≤ 1                                      | 554 (17.0)                                   | 140 (18.5)                 | 147 (18.3)                  | 123 (15.8)                  | 144 (15.5)                     |                      |
| 1 to 4                                   | 1512 (54.9)                                  | 337 (53.6)                 | 401 (53.9)                  | 363 (52.9)                  | 411 (59.1)                     |                      |
| ≥ 4                                      | 523 (28.1)                                   | 116 (28.0)                 | 129 (27.8)                  | 150 (31.3)                  | 128 (25.4)                     |                      |
| Smoking, n (%)                           |                                              |                            |                             |                             |                                | 0.083                |
| Never                                    | 2043 (76.9)                                  | 454 (74.1)                 | 515 (73.8)                  | 517 (79.6)                  | 557 (80.0)                     |                      |
| Former                                   | 68 (3.1)                                     | 17 (4.4)                   | 14 (2.0)                    | 20 (3.9)                    | 17 (2.3)                       |                      |
| Current                                  | 478 (20.0)                                   | 122 (21.5)                 | 148 (24.3)                  | 99 (16.5)                   | 109 (17.7)                     |                      |
| Drinking, n (%)                          |                                              |                            |                             |                             |                                | 0.378                |
| None                                     | 900 (33.3)                                   | 181 (29.3)                 | 236 (34.7)                  | 231 (35.5)                  | 252 (33.5)                     |                      |
| Moderate                                 | 1492 (58.2)                                  | 356 (60.3)                 | 387 (55.9)                  | 360 (56.3)                  | 389 (60.2)                     |                      |
| Heavy                                    | 197 (8.6)                                    | 56 (10.4)                  | 54 (9.4)                    | 45 (8.2)                    | 42 (6.3)                       |                      |
| Physical activity, n (%)                 |                                              |                            |                             |                             |                                | 0.149                |
| Low                                      | 1173 (49.1)                                  | 253 (47.6)                 | 312 (48.4)                  | 288 (49.8)                  | 320 (50.5)                     |                      |
| Moderate                                 | 549 (21.3)                                   | 131 (23.3)                 | 152 (23.2)                  | 140 (22.5)                  | 126 (16.3)                     |                      |
| High                                     | 867 (29.6)                                   | 209 (29.2)                 | 213 (28.4)                  | 208 (27.8)                  | 237 (33.2)                     |                      |
| CKD stages                               |                                              |                            |                             |                             |                                | 0.002                |
| Stage 1                                  | 938 (41.1)                                   | 218 (44.4)                 | 253 (44.1)                  | 246 (40.0)                  | 221 (35.8)                     |                      |
| Stage 2                                  | 668 (24.2)                                   | 157 (23.0)                 | 178 (26.0)                  | 168 (26.6)                  | 165 (21.0)                     |                      |
| Stage 3                                  | 908 (32.8)                                   | 205 (31.6)                 | 230 (28.0)                  | 208 (32.1)                  | 265 (39.4)                     |                      |
| Stage 4 and 5                            | 75 (2.0)                                     | 13 (1.1)                   | 16 (1.9)                    | 14 (1.3)                    | 32 (3.8)                       |                      |
| BMI, kg/m <sup>2</sup> , mean (SE)       | 29.43 (0.2)                                  | 30.44 (0.4)                | 29.2 (0.4)                  | 29.19 (0.4)                 | 28.91 (0.4)                    | <0.001               |
| HEI-2015, mean (SE)                      | 53.08 (0.4)                                  | 51.05 (0.8)                | 51.84 (0.6)                 | 54.11 (0.7)                 | 55.32 (0.7)                    | <0.001               |
| Systolic blood pressure, mmHg, mean (SE) | 133.42 (0.5)                                 | 131.80 (1.3)               | 134.19 (1.0)                | 132.92 (1.2)                | 134.76 (1.2)                   | <0.001               |

|                                                  |              |               |               |              |              |        |
|--------------------------------------------------|--------------|---------------|---------------|--------------|--------------|--------|
| <b>eGFR, ml/min/1.73m<sup>2</sup>, mean (SE)</b> | 81.42 (0.7)  | 82.39 (1.4)   | 83.92 (1.1)   | 82.32 (1.7)  | 77.04 (1.5)  | <0.001 |
| <b>MMA, nmol/L, mean (SE)</b>                    | 217.13 (5.1) | 302.68 (16.4) | 207.16 (12.8) | 175.95 (4.8) | 183.86 (6.5) | <0.001 |

Abbreviations BMI, body mass index; CKD, chronic kidney disease; eGFR, estimated glomerular filtration rate; HEI-2015, Healthy Eating Index-2015; MMA, methylmalonic acid; PIR, family poverty-to-income ratio; SE, stand error; <sup>a</sup> *P* values were calculated using Rao-Scott Chi-square test for categorical variables and Wald F-test for continuous variables.

**Table S2.** Supplementary Table 2. Association of vitamin B<sub>12</sub> levels with all-cause mortality and cardiovascular mortality among U.S. adults with CKD.

| Cause of death                  | Vitamin B <sub>12</sub> levels (pmol/L), HR (95% CI) |                     |                          |                          |                     | <i>P</i> for trend |
|---------------------------------|------------------------------------------------------|---------------------|--------------------------|--------------------------|---------------------|--------------------|
|                                 | Log (Vitamin B <sub>12</sub> )                       | Quartile 1 (<284.1) | Quartile 2 (284.1-397.1) | Quartile 3 (397.2-534.5) | Quartile 4 (≥534.6) |                    |
| <b>All-cause mortality</b>      |                                                      |                     |                          |                          |                     |                    |
| No. of cases/person-years       | 1192/24301                                           | 269/5154            | 322/6501                 | 279/6471                 | 322/6175            |                    |
| Model 1                         | 1.01 (0.86, 1.19)                                    | 1.00 [Reference]    | 0.94 (0.78, 1.14)        | 0.85 (0.67, 1.07)        | 0.99 (0.8, 1.22)    | 0.987              |
| Model 2                         | 1.05 (0.90, 1.22)                                    | 1.00 [Reference]    | 0.93 (0.77, 1.13)        | 0.90 (0.73, 1.11)        | 1.05 (0.85, 1.29)   | 0.534              |
| Model 3                         | 1.08 (0.92, 1.26)                                    | 1.00 [Reference]    | 1.01 (0.78, 1.31)        | 0.93 (0.71, 1.22)        | 1.22 (0.93, 1.61)   | 0.373              |
| <b>Cardiovascular mortality</b> |                                                      |                     |                          |                          |                     |                    |
| No. of cases/person-years       | 446/24301                                            | 95/5154             | 121/6501                 | 100/6471                 | 130/6175            |                    |
| Model 1                         | 1.09 (0.90, 1.33)                                    | 1.00 [Reference]    | 1.07 (0.77, 1.49)        | 0.94 (0.65, 1.37)        | 1.17 (0.87, 1.56)   | 0.360              |
| Model 2                         | 1.12 (0.92, 1.35)                                    | 1.00 [Reference]    | 1.01 (0.74, 1.38)        | 1.00 (0.71, 1.42)        | 1.24 (0.93, 1.65)   | 0.125              |
| Model3                          | 1.13 (0.93, 1.37)                                    | 1.00 [Reference]    | 1.02 (0.74, 1.39)        | 1.02 (0.72, 1.44)        | 1.26 (0.94, 1.69)   | 0.108              |

Abbreviations: CI, confidence interval; CKD, chronic kidney disease; HR, hazard ratio; Model 1: Adjusted for NHANES circles, age (continuous, year), and gender (male and female); Model 2: Further adjustment for race (Hispanic, non-Hispanic white, non-Hispanic black, and others), education (less than high school, high school and college or higher), marital status (married, separated, and never married), family poverty-to-income ratio (≤1, 1-4, ≥4), BMI (continuous, kg/m<sup>2</sup>), smoking (never, former, current), drinking (never, former, current), physical activity (low, moderate, high), diet quality (continuous, HEI-2015 score), systolic blood pressure (continuous, mmHg), eGFR(continuous, ml/min/1.73m<sup>2</sup>) based on model 1; Model 3: Further adjustment of MMA (continuous, nmol/L) based on model 2; <sup>a</sup> *P* values for trend were tested by using the median level of each quartile vitamin B<sub>12</sub> levels and modeling it as a continuous variable in model 3.

**Table S3.** Subgroup analyses for the HRs of MMA and CVD mortality among U.S. adults with CKD.

| Subgroup                     | MMA levels (nmol/L), HR (95% CI) |                      |                         |                         |                      | <i>P</i> for interaction <sup>a</sup> |
|------------------------------|----------------------------------|----------------------|-------------------------|-------------------------|----------------------|---------------------------------------|
|                              | Log (MMA)                        | Quartile 1<br>(<123) | Quartile 2<br>(123-169) | Quartile 3<br>(170-239) | Quartile 4<br>(≥240) |                                       |
| <b>Age, years</b>            |                                  |                      |                         |                         |                      | 0.819                                 |
| <65                          | 1.83 (1.14, 2.91)                | 1.00 [Reference]     | 1.35 (0.71, 2.54)       | 1.07 (0.52, 2.18)       | 2.56 (1.19, 5.52)    |                                       |
| ≥65                          | 1.24 (1.03, 1.50)                | 1.00 [Reference]     | 1.11 (0.75, 1.66)       | 1.15 (0.77, 1.69)       | 1.69 (1.14, 2.50)    |                                       |
| <b>Sex</b>                   |                                  |                      |                         |                         |                      | 0.946                                 |
| Male                         | 1.16 (0.93, 1.46)                | 1.00 [Reference]     | 1.30 (0.84, 2.01)       | 1.25 (0.80, 1.95)       | 1.69 (1.07, 2.68)    |                                       |
| Female                       | 1.70 (1.27, 2.28)                | 1.00 [Reference]     | 1.14 (0.67, 1.94)       | 1.16 (0.68, 1.99)       | 2.10 (1.22, 3.61)    |                                       |
| <b>BMI, kg/m<sup>2</sup></b> |                                  |                      |                         |                         |                      | 0.734                                 |
| <30                          | 1.18 (0.96, 1.46)                | 1.00 [Reference]     | 1.23 (0.81, 1.87)       | 1.08 (0.70, 1.68)       | 1.65 (1.07, 2.53)    |                                       |
| ≥30                          | 1.71 (1.21, 2.42)                | 1.00 [Reference]     | 1.08 (0.60, 1.92)       | 1.24 (0.71, 2.19)       | 1.96 (1.08, 3.54)    |                                       |
| <b>Smoking status</b>        |                                  |                      |                         |                         |                      | 0.689                                 |
| Never or former              | 1.32 (1.10, 1.58)                | 1.00 [Reference]     | 1.34 (0.91, 1.96)       | 1.26 (0.86, 1.85)       | 1.90 (1.29, 2.79)    |                                       |
| Current                      | 1.39 (0.81, 2.38)                | 1.00 [Reference]     | 1.07 (0.49, 2.36)       | 1.31 (0.58, 3.00)       | 2.09 (0.86, 5.09)    |                                       |

|                                       |                   |                  |                   |                   |                    |  |       |
|---------------------------------------|-------------------|------------------|-------------------|-------------------|--------------------|--|-------|
| <b>Alcohol consumption</b>            |                   |                  |                   |                   |                    |  | 0.191 |
| None                                  | 1.22 (0.92, 1.62) | 1.00 [Reference] | 1.29 (0.73, 2.28) | 1.23 (0.69, 2.21) | 1.84 (1.03, 3.29)  |  |       |
| Moderate                              | 1.37 (1.08, 1.73) | 1.00 [Reference] | 1.18 (0.75, 1.85) | 1.09 (0.69, 1.73) | 1.72 (1.08, 2.75)  |  |       |
| Heavy                                 | 1.58 (0.55, 4.52) | 1.00 [Reference] | 1.20 (0.26, 5.49) | 1.94 (0.42, 8.85) | 3.35 (0.60, 18.58) |  |       |
| <b>Physical activity</b>              |                   |                  |                   |                   |                    |  | 0.057 |
| Low                                   | 1.44 (1.10, 1.89) | 1.00 [Reference] | 1.22 (0.7, 2.15)  | 1.35 (0.76, 2.37) | 2.26 (1.27, 4.02)  |  |       |
| Moderate                              | 1.65 (1.10, 2.48) | 1.00 [Reference] | 1.34 (0.60, 2.98) | 1.73 (0.77, 3.88) | 2.57 (1.1, 5.96)   |  |       |
| High                                  | 1.09 (0.83, 1.43) | 1.00 [Reference] | 1.13 (0.68, 1.87) | 0.86 (0.50, 1.46) | 1.33 (0.79, 2.26)  |  |       |
| <b>eGFR, ml/min/1.73m<sup>2</sup></b> |                   |                  |                   |                   |                    |  | 0.914 |
| <60                                   | 1.20 (0.94, 1.54) | 1.00 [Reference] | 0.80 (0.41, 1.54) | 0.94 (0.51, 1.72) | 1.34 (0.73, 2.43)  |  |       |
| ≥60                                   | 1.40 (1.10, 1.77) | 1.00 [Reference] | 1.46 (0.99, 2.15) | 1.40 (0.91, 2.16) | 2.10 (1.33, 3.31)  |  |       |
| <b>CKD stage</b>                      |                   |                  |                   |                   |                    |  | 0.930 |
| 1                                     | 1.09 (0.71, 1.68) | 1.00 [Reference] | 1.12 (0.60, 2.10) | 0.77 (0.34, 1.73) | 1.84 (0.75, 4.52)  |  |       |
| 2                                     | 1.62 (1.16, 2.26) | 1.00 [Reference] | 1.88 (1.09, 3.26) | 1.91 (1.06, 3.45) | 2.63 (1.44, 4.79)  |  |       |
| Stage3-5                              | 1.20 (0.94, 1.54) | 1.00 [Reference] | 0.80 (0.41, 1.54) | 0.94 (0.51, 1.72) | 1.34 (0.73, 2.43)  |  |       |

Abbreviations: BMI, body mass index; CI, confidence interval; CKD, chronic kidney disease; eGFR, estimated glomerular filtration rate; HR, hazard ratio; Model was adjusted for NHANES circles, age (continuous, year), and sex (male and female), race (Hispanic, non-Hispanic white, non-Hispanic black, and others), education (less than high school, high school and college or higher), marital status (married, separated, and never married), family poverty-to-income ratio (≤1, 1-4, ≥4), BMI (continuous, kg/m<sup>2</sup>), smoking (never, former, current), drinking (never, former, current), physical activity (low, moderate, high), diet quality (continuous, HEI-2015 score), systolic blood pressure (continuous, mmHg), eGFR(continuous, ml/min/1.73m<sup>2</sup>), vitamin B<sub>12</sub> (continuous, pmol/L); <sup>a</sup> *P* for interaction was estimated by including an interaction term of the composite MMA and stratifying variables in the Cox regression model and testing using the Wald test.

**Table S4.** HRs (95% CIs) of all-cause mortality and cardiovascular mortality according to MMA levels after excluding CKD patients with cardiovascular disease and diabetes (*n* = 1335).

| Cause of death                  | MMA levels (nmol/L), HR (95% CI) |                     |                          |                          |                     | <i>P</i> for trend <sup>a</sup> |
|---------------------------------|----------------------------------|---------------------|--------------------------|--------------------------|---------------------|---------------------------------|
|                                 | Log (MMA)                        | Quartile 1 (<117.0) | Quartile 2 (117.0-159.0) | Quartile 3 (160.0-213.0) | Quartile 4 (≥214.0) |                                 |
| <b>All-cause mortality</b>      |                                  |                     |                          |                          |                     |                                 |
| No. of cases/person-years       | 496/13789                        | 54/4037             | 94/3569                  | 129/2878                 | 219/3305            |                                 |
| Model 1                         | 1.36 (1.08, 1.71)                | 1.00 [Reference]    | 0.97 (0.62, 1.53)        | 1.36 (0.89, 2.07)        | 1.48 (1.02, 2.14)   | <0.001                          |
| Model 2                         | 1.44 (1.13, 1.83)                | 1.00 [Reference]    | 1.08 (0.70, 1.67)        | 1.61 (1.01, 2.54)        | 1.81 (1.25, 2.61)   | <0.001                          |
| Model 3                         | 1.44 (1.13, 1.84)                | 1.00 [Reference]    | 1.08 (0.70, 1.67)        | 1.61 (1.02, 2.54)        | 1.80 (1.25, 2.61)   | <0.001                          |
| <b>Cardiovascular mortality</b> |                                  |                     |                          |                          |                     |                                 |
| No. of cases/person-years       | 156/13789                        | 19/4037             | 28/3569                  | 34/2878                  | 75/3305             |                                 |
| Model 1                         | 1.38 (1.01, 1.88)                | 1.00 [Reference]    | 0.79 (0.46, 1.36)        | 1.01 (0.52, 1.99)        | 1.37 (0.88, 2.13)   | 0.032                           |
| Model 2                         | 1.33 (0.99, 1.79)                | 1.00 [Reference]    | 0.76 (0.43, 1.36)        | 1.24 (0.52, 2.92)        | 1.39 (0.80, 2.42)   | 0.031                           |
| Model 3                         | 1.33 (0.99, 1.79)                | 1.00 [Reference]    | 0.76 (0.43, 1.35)        | 1.24 (0.52, 2.92)        | 1.40 (0.80, 2.44)   | 0.030                           |

Abbreviations: CI, confidence interval; CKD, chronic kidney disease; MMA, methylmalonic acid; HR, hazard ratio; Model 1: Adjusted for NHANES circles, age (continuous, year), and sex (male and female); Model 2: Further adjustment for race (Hispanic, non-Hispanic white, non-Hispanic black, and others), education (less than high school, high school and college or higher), marital status (married, separated, and never married), family poverty-to-income ratio (≤1, 1-4, ≥4), BMI (continuous, kg/m<sup>2</sup>), smoking (never, former, current), drinking (never, former, current), physical

activity (low, moderate, high), diet quality (continuous, HEI-2015 score) systolic blood pressure (continuous, mm Hg), eGFR(continuous, ml/min/1.73m<sup>2</sup>) based on model 1; Model 3: Further adjustment for vitamin B<sub>12</sub> (continuous, pmol/L) based on model 2; <sup>a</sup> *P* values for trend were tested by using the median level of each quartile MMA levels and modeling it as a continuous variable.

**Table S5:** HRs (95% CIs) of all-cause mortality and cardiovascular mortality according to MMA levels after excluding CKD patients with less than 3 years of follow-up (*n* = 2349).

| Cause of death                  | MMA levels (nmol/L), HR (95% CI) |                        |                             |                             |                        | <i>P</i> for trend <sup>a</sup> |
|---------------------------------|----------------------------------|------------------------|-----------------------------|-----------------------------|------------------------|---------------------------------|
|                                 | Log (MMA)                        | Quartile 1<br>(<121.0) | Quartile 2<br>(121.0-165.0) | Quartile 3<br>(166.0-229.0) | Quartile 4<br>(≥230.0) |                                 |
| <b>All-cause mortality</b>      |                                  |                        |                             |                             |                        |                                 |
| No. of cases/person-years       | 952/23886                        | 142/7458               | 197/5790                    | 253/5390                    | 360/5248               |                                 |
| Model 1                         | 1.49 (1.25, 1.77)                | 1.00 [Reference]       | 1.31 (0.97, 1.76)           | 1.37 (0.99, 1.9)            | 1.95 (1.51, 2.52)      | <0.001                          |
| Model 2                         | 1.54 (1.27, 1.86)                | 1.00 [Reference]       | 1.36 (1.01, 1.84)           | 1.5 (1.06, 2.14)            | 2.13 (1.58, 2.88)      | <0.001                          |
| Model 3                         | 1.54 (1.27, 1.87)                | 1.00 [Reference]       | 1.36 (1.01, 1.84)           | 1.5 (1.06, 2.13)            | 2.13 (1.58, 2.88)      | <0.001                          |
| <b>Cardiovascular mortality</b> |                                  |                        |                             |                             |                        |                                 |
| No. of cases/person-years       | 351/23886                        | 51/7458                | 80/5790                     | 81/5390                     | 139/5248               |                                 |
| Model 1                         | 1.38 (1.13, 1.68)                | 1.00 [Reference]       | 1.36 (0.88, 2.1)            | 1.07 (0.71, 1.60)           | 1.89 (1.34, 2.67)      | <0.001                          |
| Model 2                         | 1.36 (1.10, 1.67)                | 1.00 [Reference]       | 1.41 (0.89, 2.24)           | 1.12 (0.71, 1.78)           | 1.91 (1.26, 2.88)      | 0.001                           |
| Model 3                         | 1.36 (1.10, 1.68)                | 1.00 [Reference]       | 1.41 (0.89, 2.24)           | 1.12 (0.71, 1.78)           | 1.91 (1.26, 2.89)      | 0.001                           |

Abbreviations: CI, confidence interval; CKD, chronic kidney disease; MMA, methylmalonic acid; HR, hazard ratio; Model 1: Adjusted for NHANES circles, age (continuous, year), and sex (male and female); Model 2: Further adjustment for race (Hispanic, non-Hispanic white, non-Hispanic black, and others), education (less than high school, high school and college or higher), marital status (married, separated, and never married), family poverty-to-income ratio (<1, 1-4, >4), BMI (continuous, kg/m<sup>2</sup>), smoking (never, former, current), drinking (never, former, current), physical activity (low, moderate, high), diet quality (continuous, HEI-2015 score) systolic blood pressure (continuous, mmHg), eGFR(continuous, mL/min/1.73m<sup>2</sup>) based on model 1; Model 3: Further adjustment for vitamin B<sub>12</sub> (continuous, pmol/L) based on model 2; <sup>a</sup> *P* values for trend were tested by using the median level of each quartile MMA levels and modeling it as a continuous variable.

**Table S6.** HRs (95% CIs) of all-cause mortality according to MMA levels among CKD patients with further adjustment for several biomarkers.

| Cause of death             | MMA levels (nmol/L), HR (95% CI) |                   |                  |                   |                   | <i>P</i> for trend       |
|----------------------------|----------------------------------|-------------------|------------------|-------------------|-------------------|--------------------------|
|                            | Log (MMA)                        | Quartile 1        | Quartile 2       | Quartile 3        | Quartile 4        |                          |
| <b>All-cause mortality</b> |                                  |                   |                  |                   |                   |                          |
| No. of cases/person-years  | 1192/24301                       | 169/7670          | 233/5888         | 337/5851          | 453/4892          |                          |
| Model 1                    | 2589                             | 1.09 (0.90, 1.34) | 1.00 [Reference] | 1.20 (0.91, 1.57) | 1.28 (0.94, 1.76) | 2.01 (1.54, 2.62) <0.001 |
| Model 2                    | 1427                             | 1.36 (1.10, 1.69) | 1.00 [Reference] | 1.29 (0.91, 1.84) | 1.29 (0.90, 1.83) | 1.77 (1.30, 2.41) <0.001 |

|                           |      |                   |                     |                   |                   |                   |        |
|---------------------------|------|-------------------|---------------------|-------------------|-------------------|-------------------|--------|
| Model 3                   | 2587 | 1.49 (1.28, 1.73) | 1.00<br>[Reference] | 1.16 (0.89, 1.51) | 1.23 (0.90, 1.69) | 1.91 (1.47, 2.48) | <0.001 |
| Model 4                   | 2589 | 1.51 (1.29, 1.76) | 1.00<br>[Reference] | 1.20 (0.92, 1.57) | 1.30 (0.95, 1.77) | 2.02 (1.55, 2.63) | <0.001 |
| Cardiovascular mortality  |      |                   |                     |                   |                   |                   |        |
| No. of cases/person-years |      | 446/24301         | 61/7670             | 95/5888           | 115/5851          | 175/4892          |        |
| Model 1                   | 2589 | 1.30 (1.08, 1.57) | 1.00<br>[Reference] | 1.29 (0.85, 1.97) | 1.04 (0.69, 1.58) | 1.76 (1.18, 2.63) | 0.088  |
| Model 2                   | 1427 | 1.17 (0.90, 1.5)  | 1.00<br>[Reference] | 1.17 (0.72, 1.90) | 1.10 (0.72, 1.69) | 1.41 (0.93, 2.14) | 0.095  |
| Model 3                   | 2587 | 1.27 (1.05, 1.53) | 1.00<br>[Reference] | 1.24 (0.83, 1.85) | 0.99 (0.66, 1.48) | 1.63 (1.12, 2.39) | 0.001  |
| Model 4                   | 2589 | 1.30 (1.08, 1.57) | 1.00<br>[Reference] | 1.30 (0.85, 1.99) | 1.05 (0.69, 1.60) | 1.77 (1.18, 2.66) | <0.001 |

Abbreviations: CI, confidence interval, CKD, chronic kidney disease; MMA, methylmalonic acid; HR, hazard ratio; Model 1: Adjusted for NHANES circles, age (continuous, year), and sex (male and female), race (Hispanic, non-Hispanic white, non-Hispanic black, and others), education (less than high school, high school and college or higher), marital status (married, separated, and never married), family poverty-to-income ratio (<1, 1-4, >4), BMI (continuous, kg/m<sup>2</sup>), smoking (never, former, current), drinking (never, former, current), physical activity (low, moderate, high), diet quality (continuous, HEI-2015 score), systolic blood pressure (continuous, mm Hg), eGFR(continuous, ml/min/1.73m<sup>2</sup>), vitamin B<sub>12</sub> (continuous, pmol/L); Model 2: model 1+ homocysteine; Model 3: model 1+HbA<sub>1c</sub>; Model 4: model 1+total cholesterol; <sup>a</sup> P values for trend were tested by using the median level of each quartile MMA levels and modeling it as a continuous variable.
